# Supplementary material
Source: PubMed Central journal article supplement (PMC2975210)
Supplement: supp_M110.167189_jbc.M110.167189-1.pdf [file supp_M110.167189_jbc.M110.167189-1.pdf]

**Figure S1. Immunoblotting analyses of hepatic ER- and cytosolic chaperones in hepatocyte lysates after gp78 or CHIP knockdown.** Lysate protein (50 µg) from cells infected with CT, gp78 1/2 or CHIP-4 shRNAs for 7 days were subjected to SDS-PAGE, electroblotting onto nitrocellulose membrane, and subsequent immunoblotting analyses with a specific primary rabbit polyclonal antibody to Grp78/BiP (SPA-826R, Stressgen; 1:10,000, v/v), Grp94 (SPA-851D, Stressgen; 1:10,000, v/v), HSP70 (ab2412, Abcam; 1:5,000, v/v), or HSP90 (ab13495, Abcam; 1:20,000, v/v) followed by goat anti-rabbit HRP-conjugated secondary antibody (#170-6515, BioRad; 1:20,000, v/v). The immunoblots were developed as described in Experimental Procedures.
